# Supplementary material for: Understanding the mechanism of red light-induced melatonin biosynthesis facilitates the engineering of melatonin-enriched tomatoes
Source: PubMed Central journal article supplement (PMC10491657; doi:10.1038/s41467-023-41307-5), 2023-09-08
Supplement: 41467_2023_41307_MOESM1_ESM.pdf [file 41467_2023_41307_MOESM1_ESM.pdf]

**Understanding the mechanism of red light-induced  
melatonin biosynthesis facilitates the engineering of  
melatonin-enriched tomatoes**

Zixin Zhang and Yang Zhang *et al.*

## Supplementary Figures

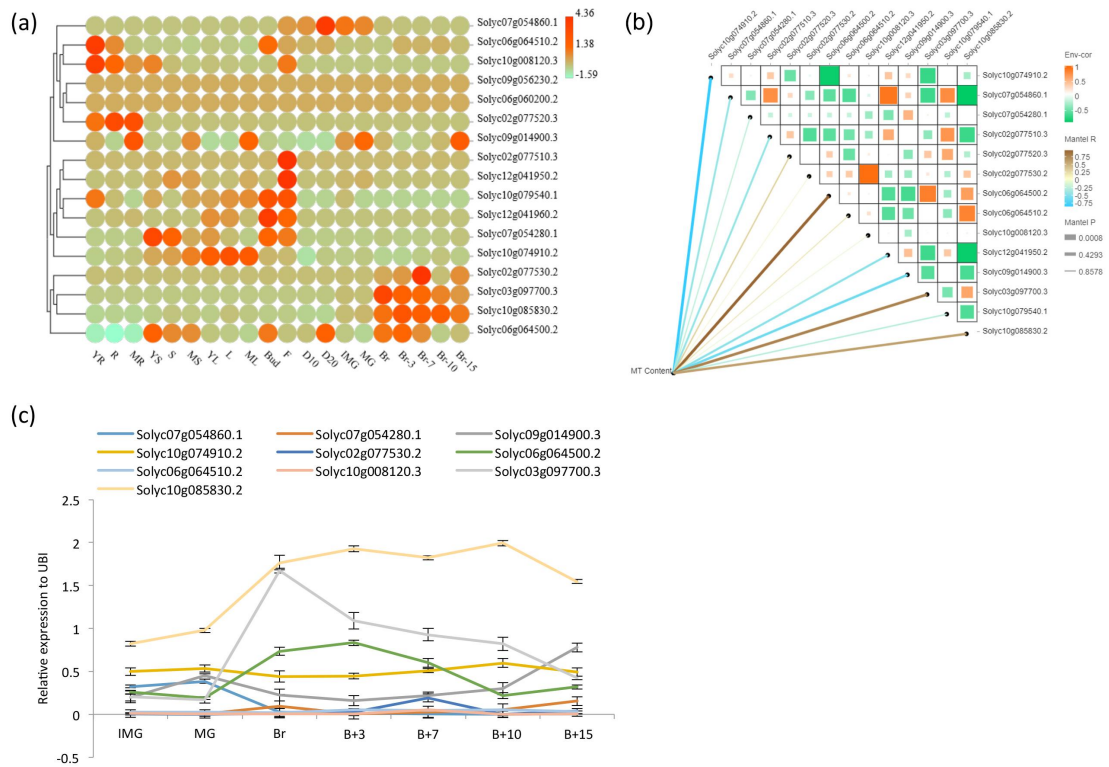

**Fig. S1 Screening of key structural genes for melatonin synthesis.**

(a) The expression analysis heat map of melatonin synthase gene obtained by screening from MMN Database. (b) Correlation analysis between melatonin content and structural genes. (c) Identification of melatonin synthase gene by RT-qPCR. Data are represented as Mean  $\pm$  SD (n=3). One biological replicate is the pool of 10-12 fruit from the same seedling. (associated with Fig. 1)

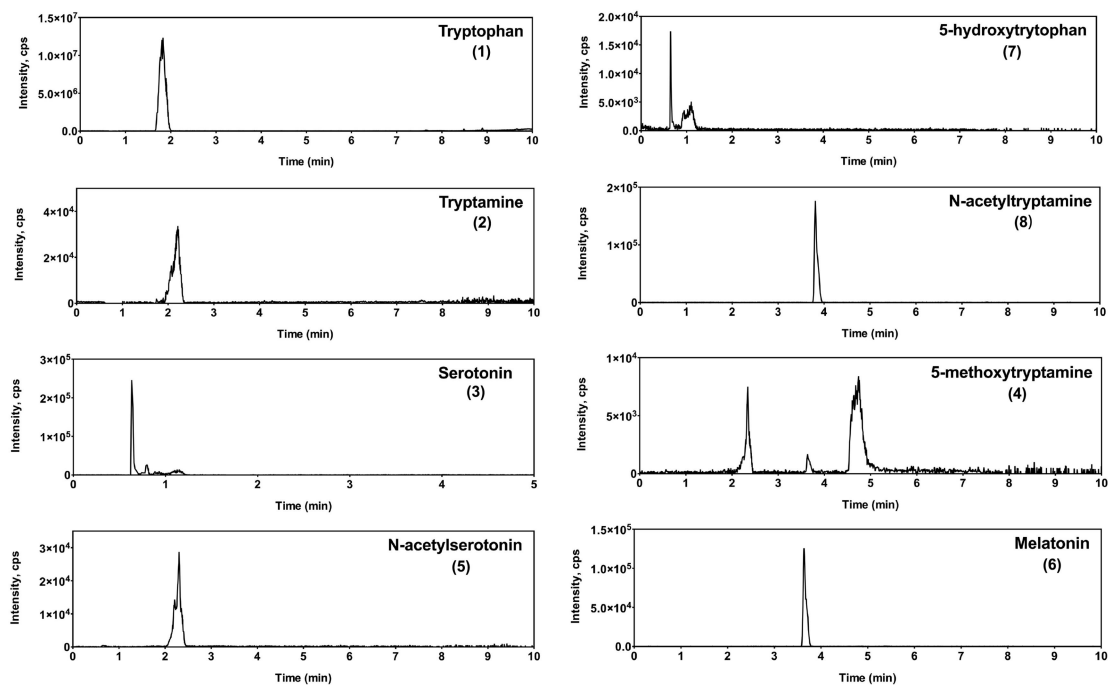

**Fig. S2 Peak time of melatonin and its intermediates detected by LC/MS.**

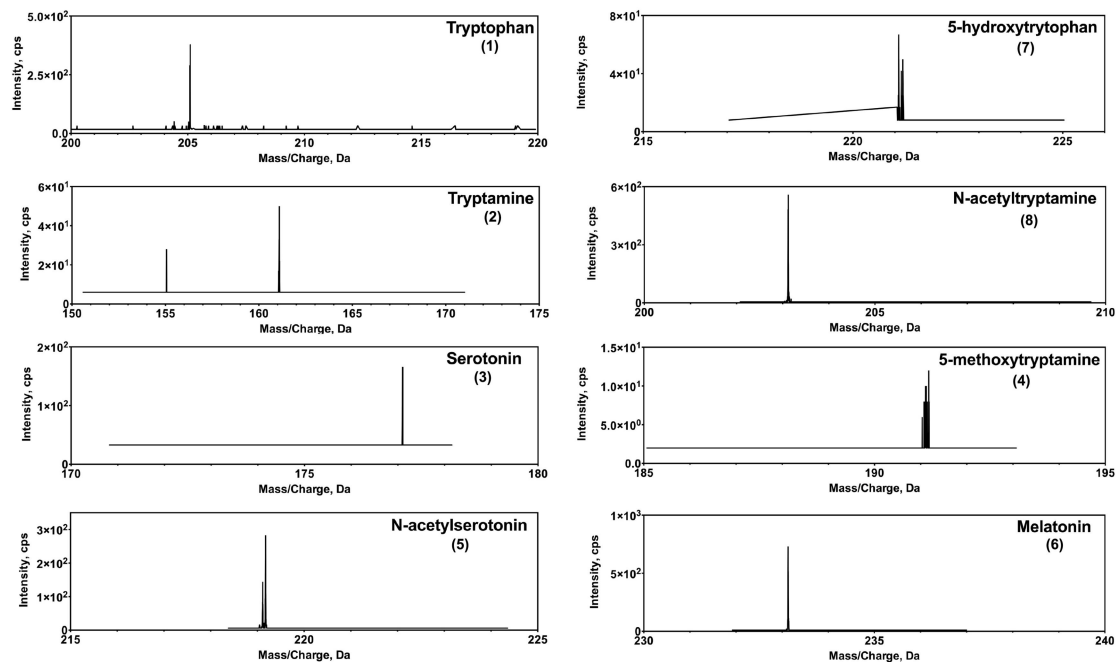

**Fig. S3 Molecular weight mass spectra of melatonin and its intermediates detected by LC/MS.**

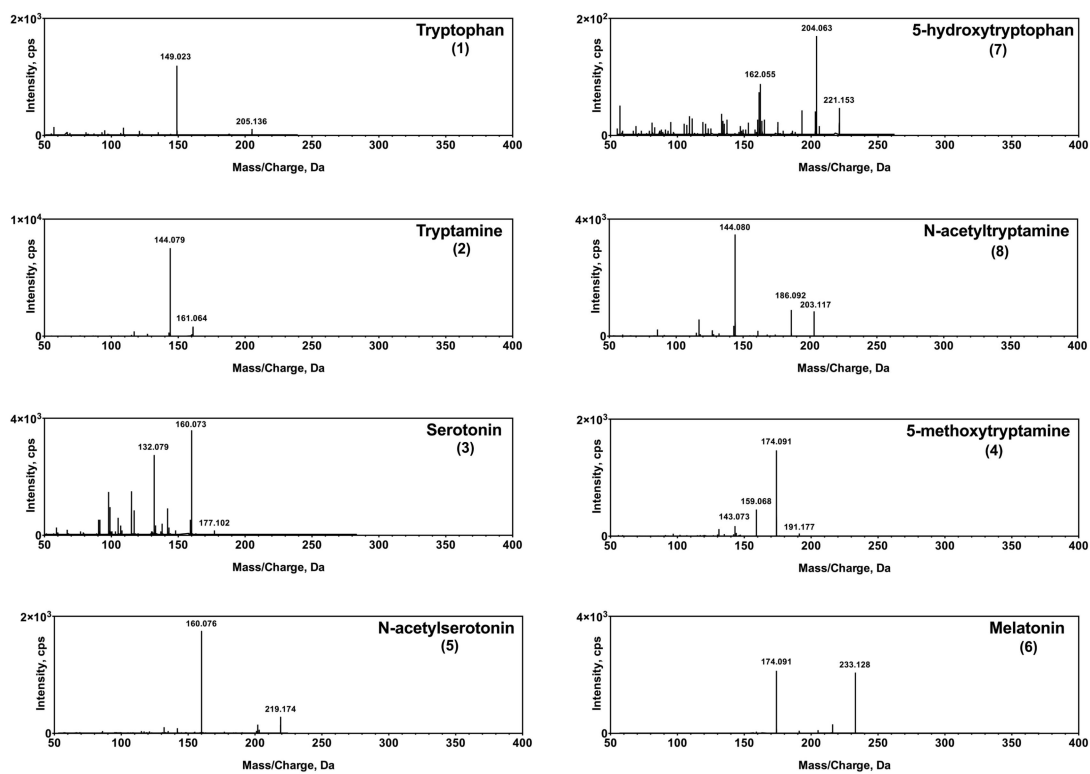

**Fig. S4** The MS/MS spectrum of melatonin and its intermediates detected by LC/MS.

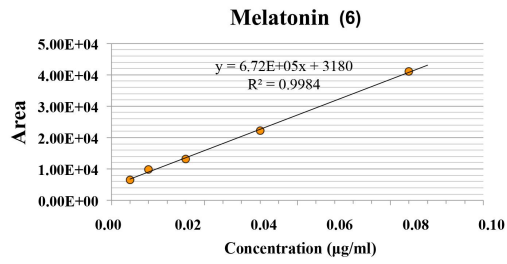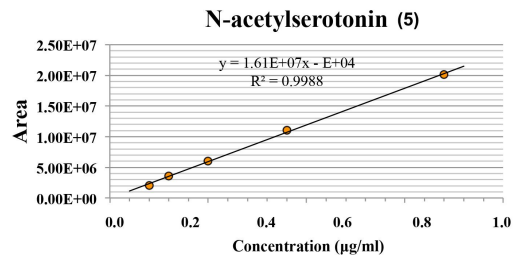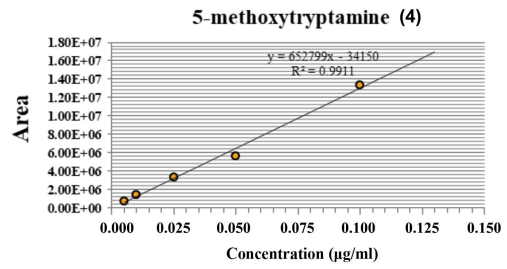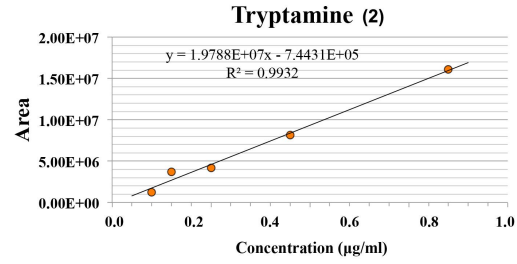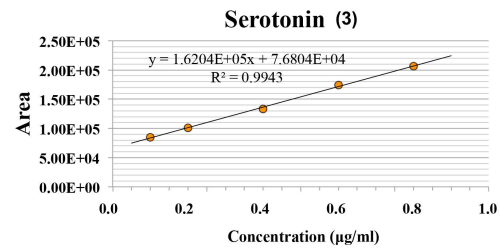

**Fig. S5 Standard curve of melatonin and its intermediates.**

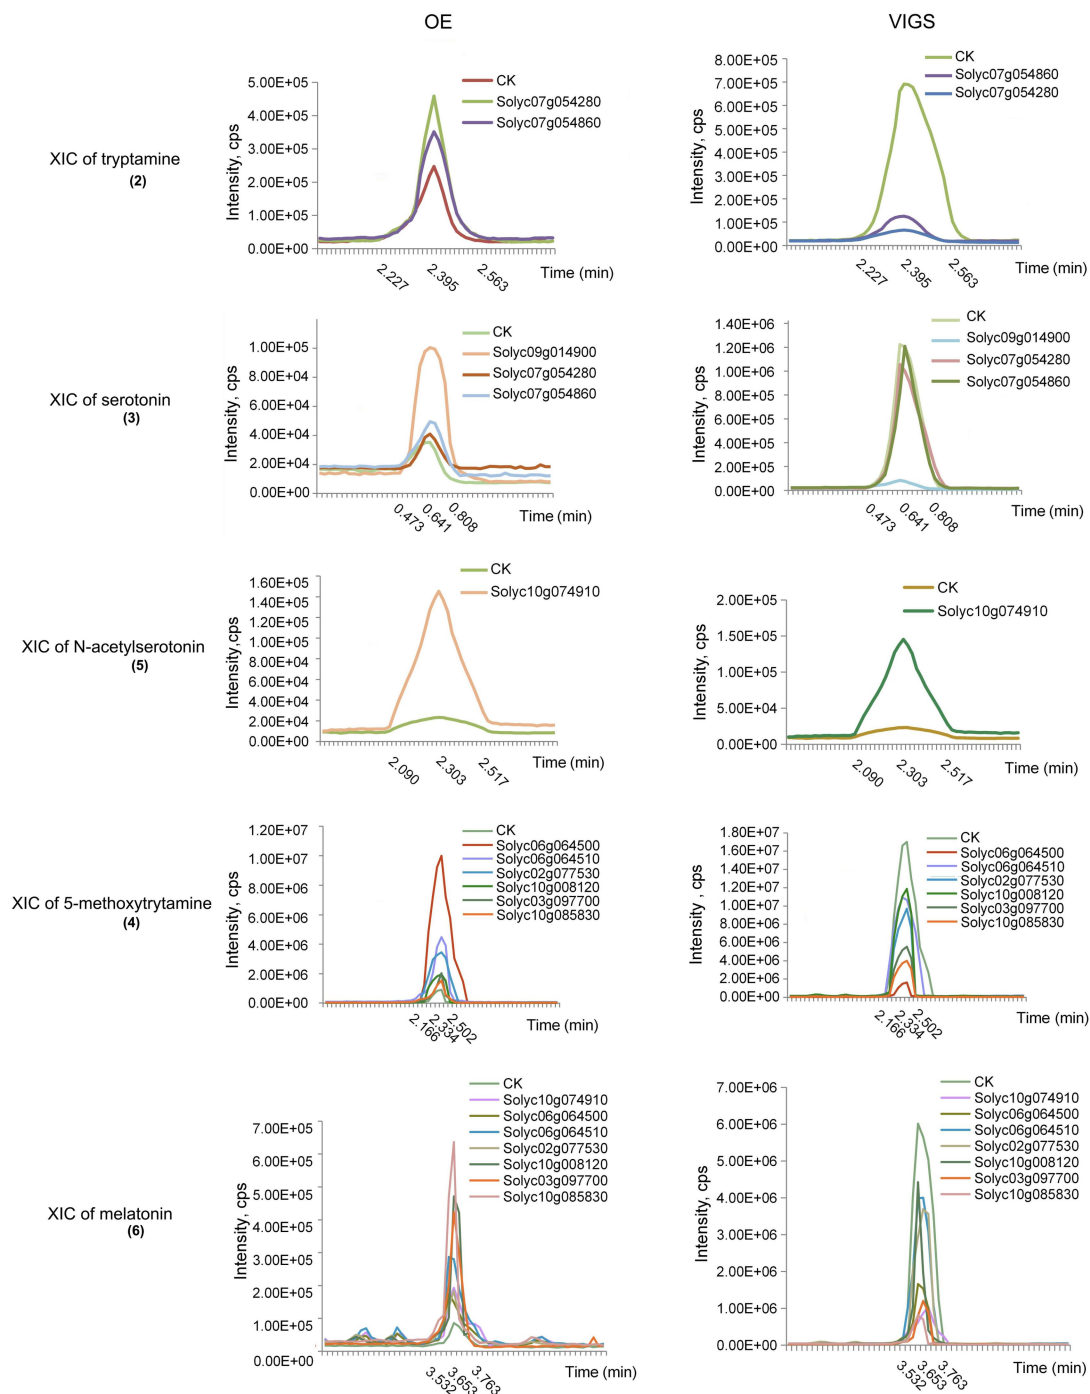

**Fig. S6** The extracted ion chromatogram (XIC) of melatonin and its intermediates detected by LC/MS in instantaneously transformed samples. (associated with Fig. 1c ).

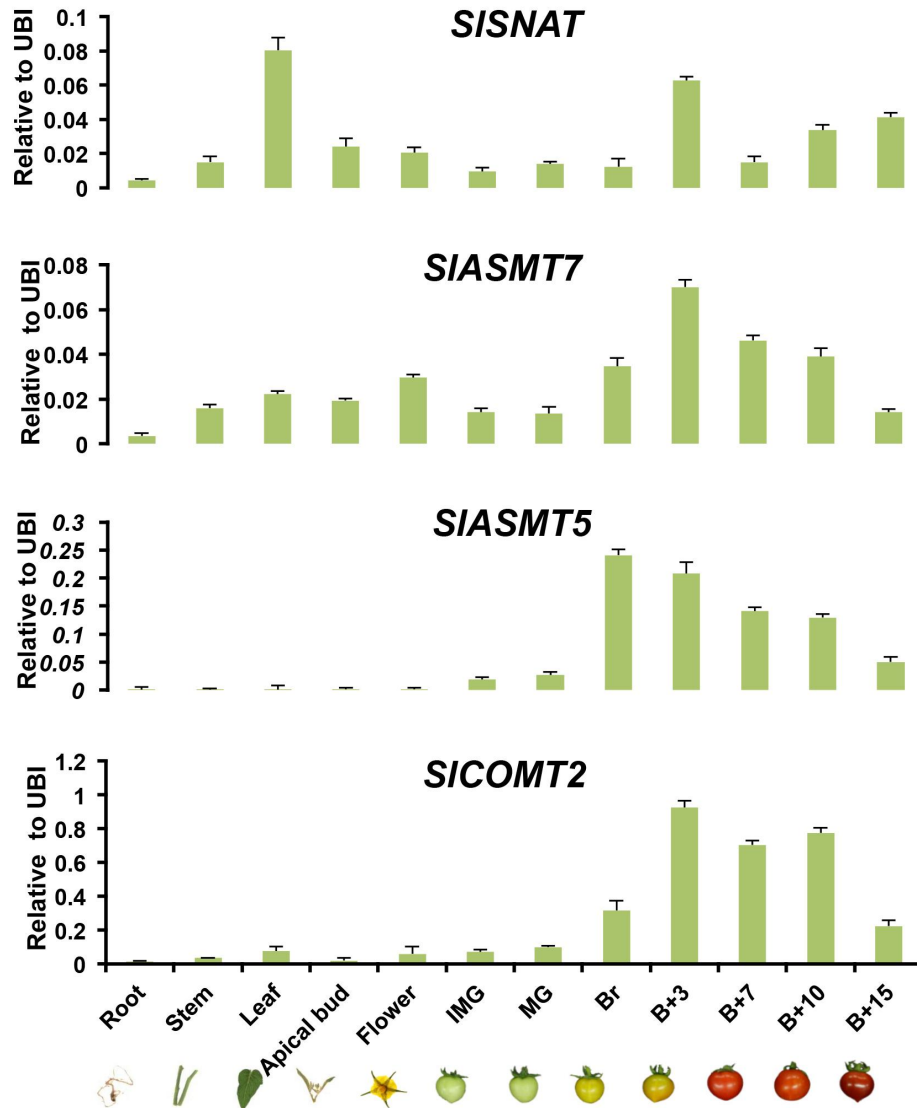

**Fig. S7 Tissue expression quantification of four melatonin biosynthetic genes (*SISNAT*, *SIASMT7*, *SIASMT5*, *SICOMT2*).** Data are represented as Mean  $\pm$  SD (n=3). In which 10-12 individual issues were pooled as one biological replicate.



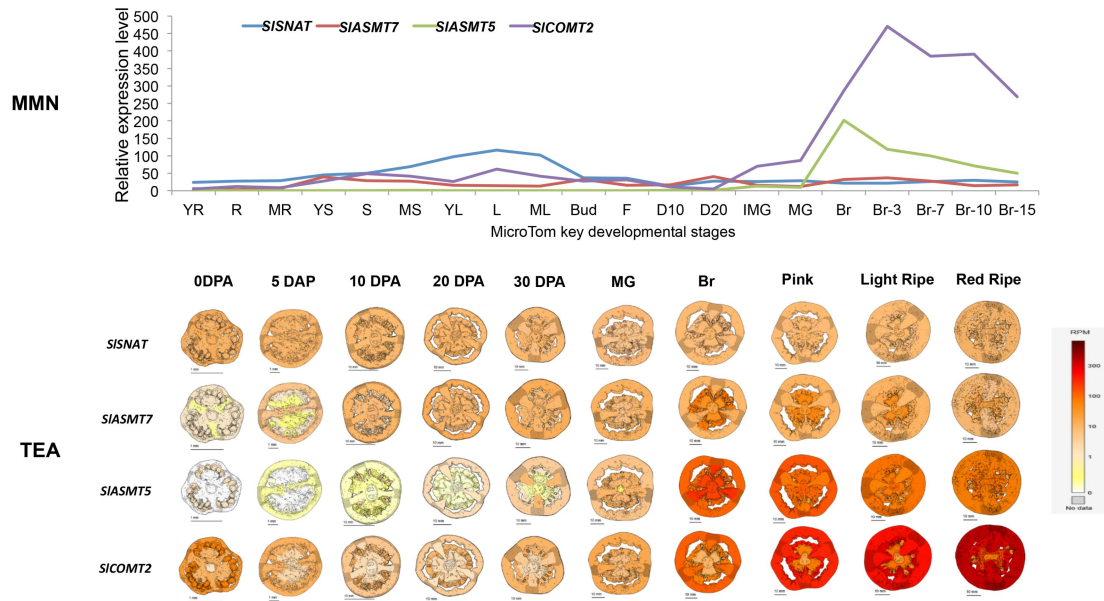

**Fig. S8** The expression profile of four melatonin biosynthetic genes (*SISNAT*, *SIASMT7*, *SIASMT5*, *SICOMT2*) in MMN<sup>34</sup> and TEA databases<sup>35</sup>.

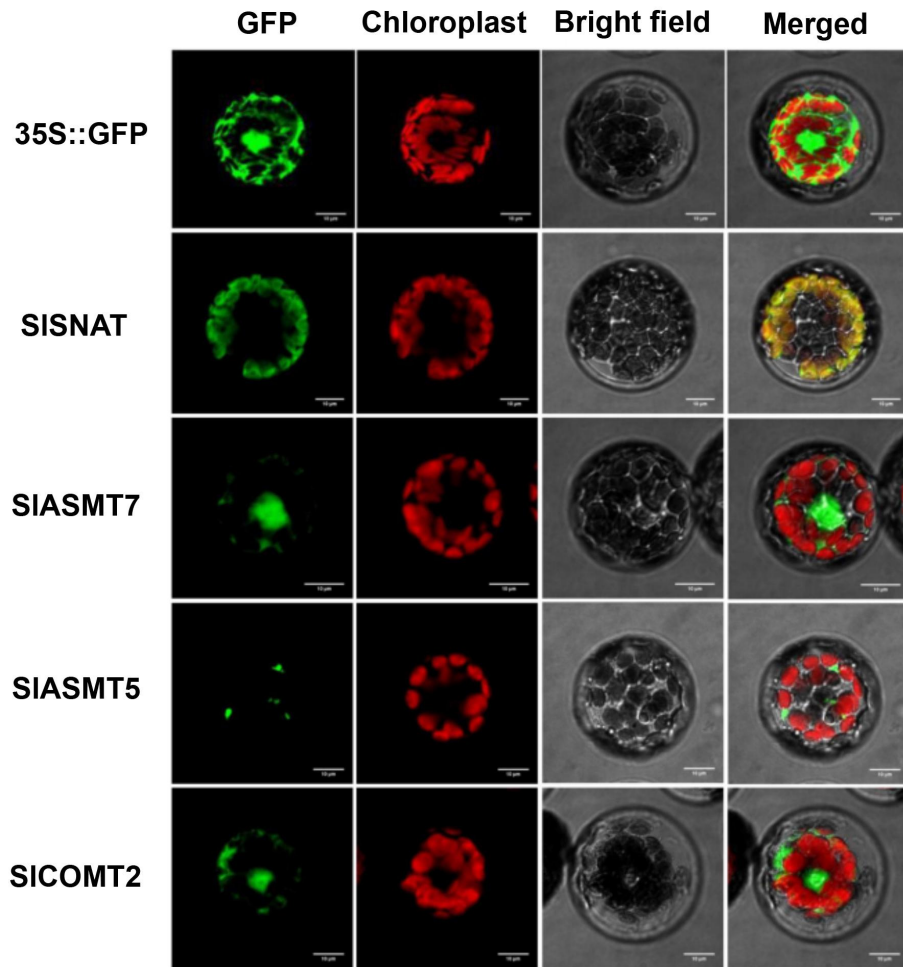

**Fig. S9** The proteins' subcellular localization in *Arabidopsis* protoplasts.

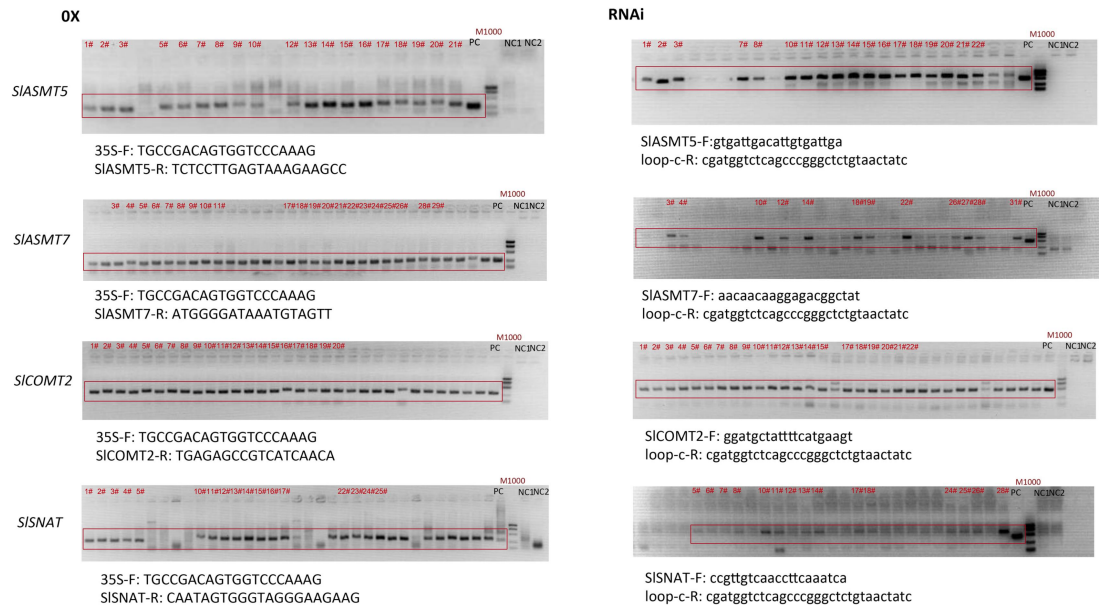

**Fig. S10 Genotyping of the overexpressing and RNAi interfering  $T_0$  lines for four melatonin biosynthetic genes (*SISNAT*, *SIASMT7*, *SIASMT5*, *SICOMT2*).** PC represents the positive control, which was performed by the construction plasmid, and NC1 and NC2 refers to negative control, NC1 was a template from WT, NC2 was a template from the ddH<sub>2</sub>O. The respective detection primers are at the bottom of each map. (associated with Fig. 2a ). Source data are provided as a Source Data file.

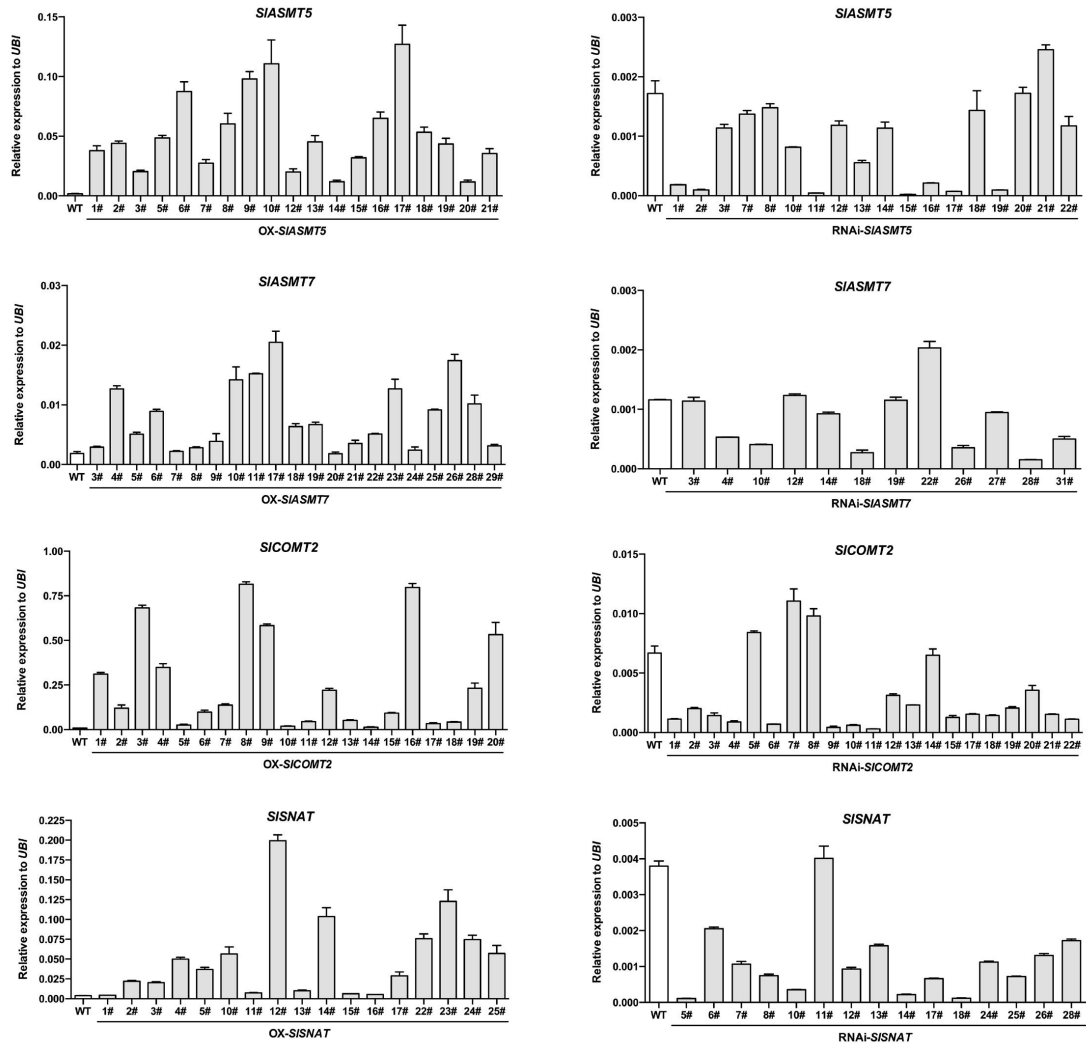

**Fig. S11** Transcript level of four melatonin biosynthetic genes (*SISNAT*, *SIASMT7*, *SIASMT5*, *SICOMT2*) in the overexpressing and RNAi interfering T<sub>0</sub> lines. Data represent the mean ± SD (n=3). The expression level of one T<sub>0</sub> fruit at Br+3 was calculated as one biological replicate. (associated with Fig. 2a ).

### XIC of melatonin

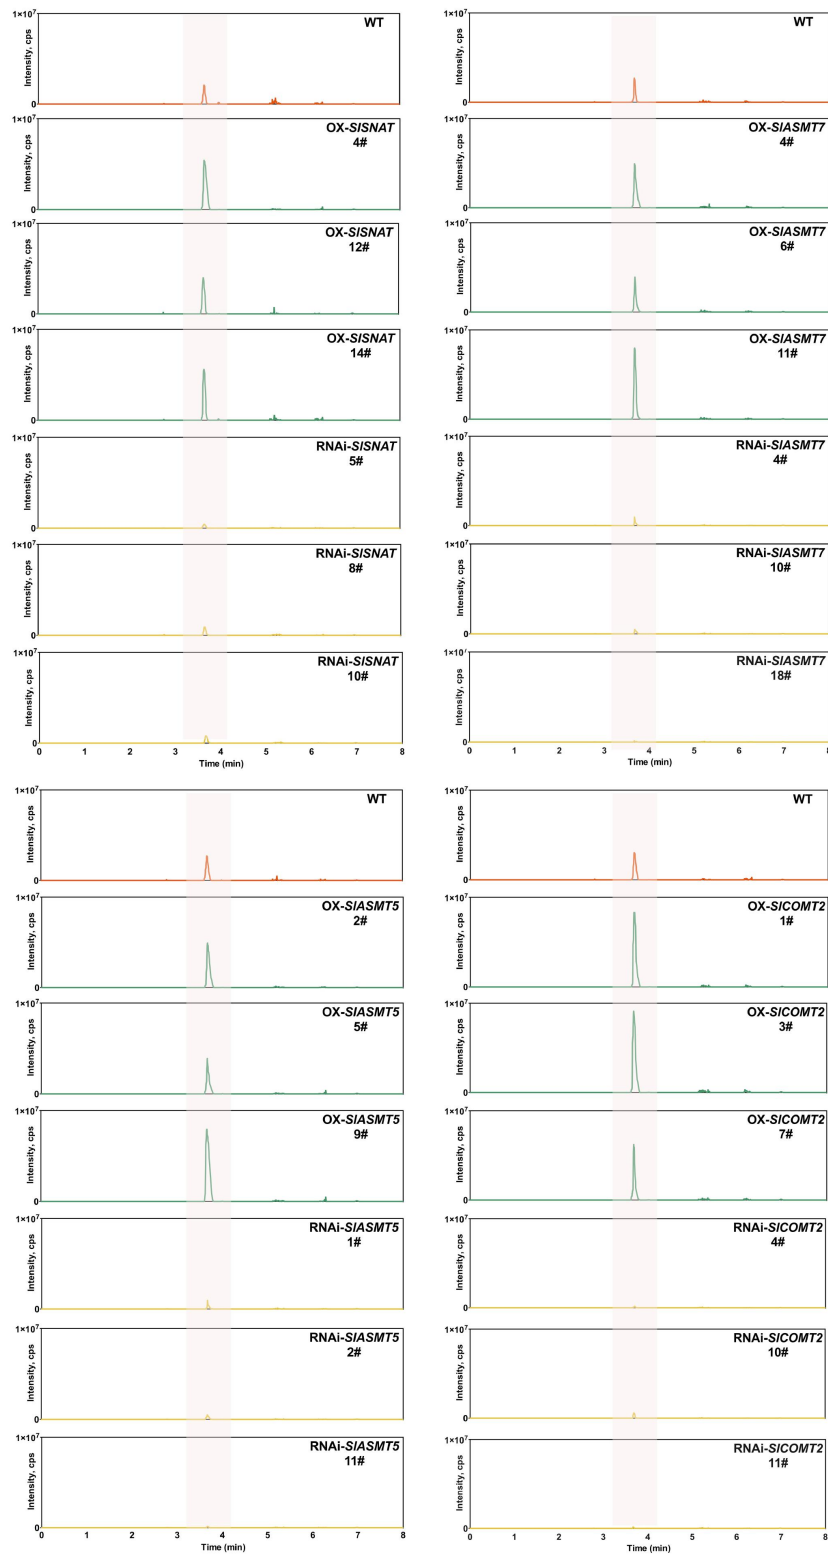

**Fig. S12** The extracted ion chromatogram (XIC) of melatonin detected by LC/MS in stable transgenic tomato. (associated with Fig. 2a ). Source data are provided as a Source Data file.

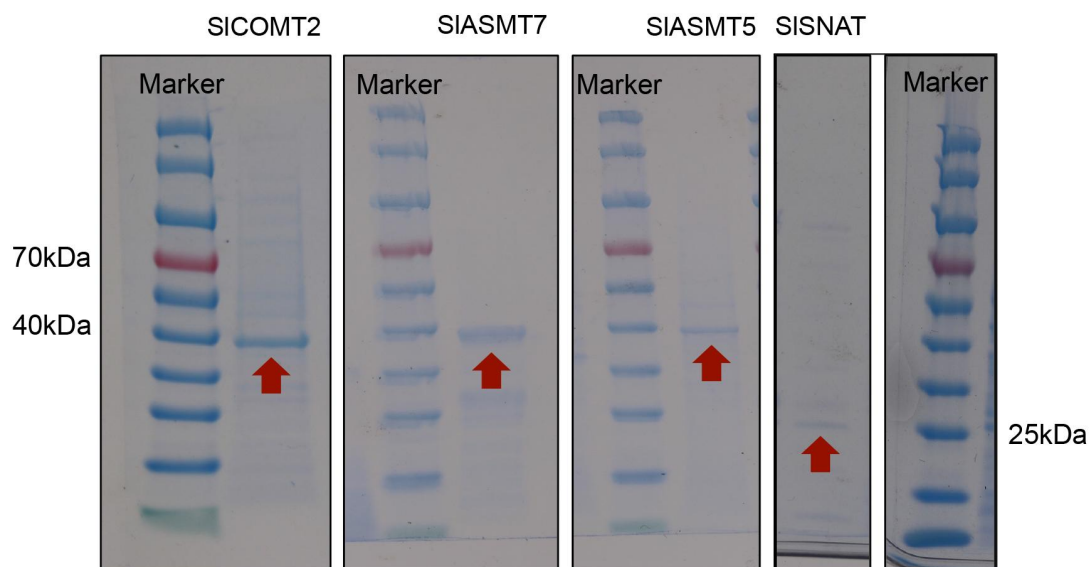

**Fig. S13** The purification of SICOMT2, SIASMT7, SIASMT5 and SISNAT. (associated with Fig. 2b). Source data are provided as a Source Data file.

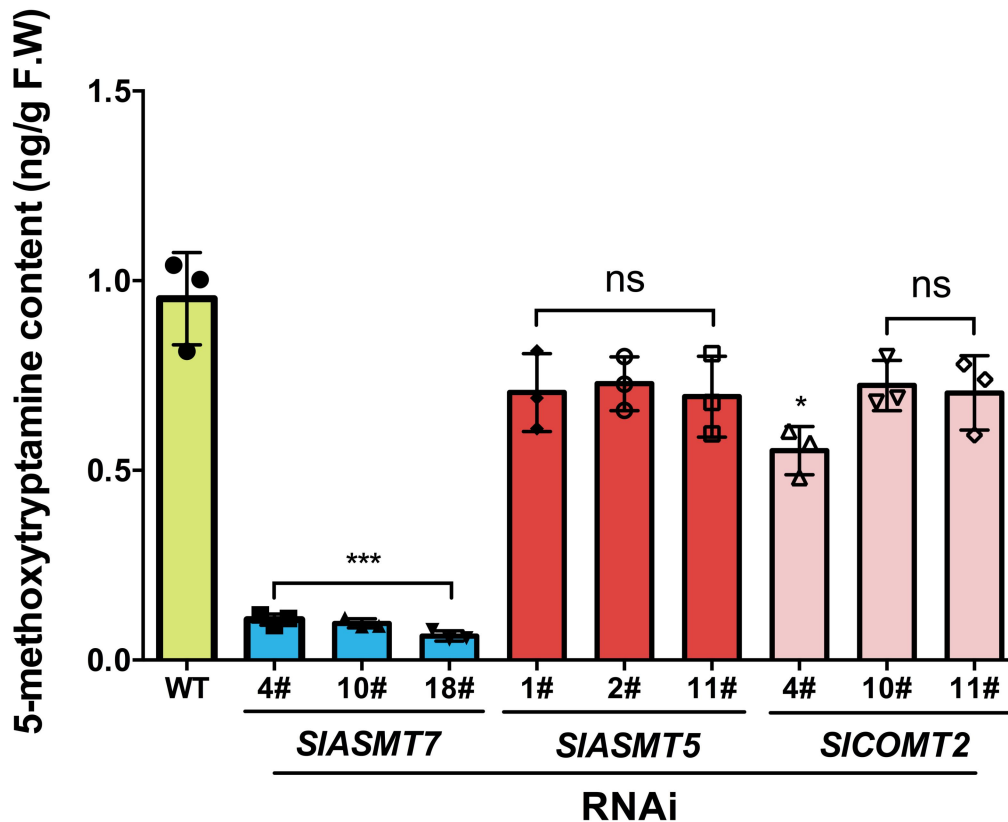

**Fig. S14 Content of 5-methoxytryptamine (4) in the fruit of WT and T1 transgenic lines.** 5-methoxytryptamine (4) content of WT and T1 RNAi fruits at the Br+3 stage. Data is represented as Mean  $\pm$  SEM (n=3). 10-12 tomato fruits from the same seedling were pooled as one biological replicate. (\*\*\*)P=0.0003, *SIASMT7* 4#), (\*\*\*)P=0.0003, *SIASMT7* 10#), (\*\*\*)P=0.0002, *SIASMT7* 18#), (\*P=0.0072, *SICOMT2* 4#), ns indicates not significant (P>0.05). \* indicates significant difference from WT analyzed by two-sided Student's t test.(associated with Fig. 3b ).

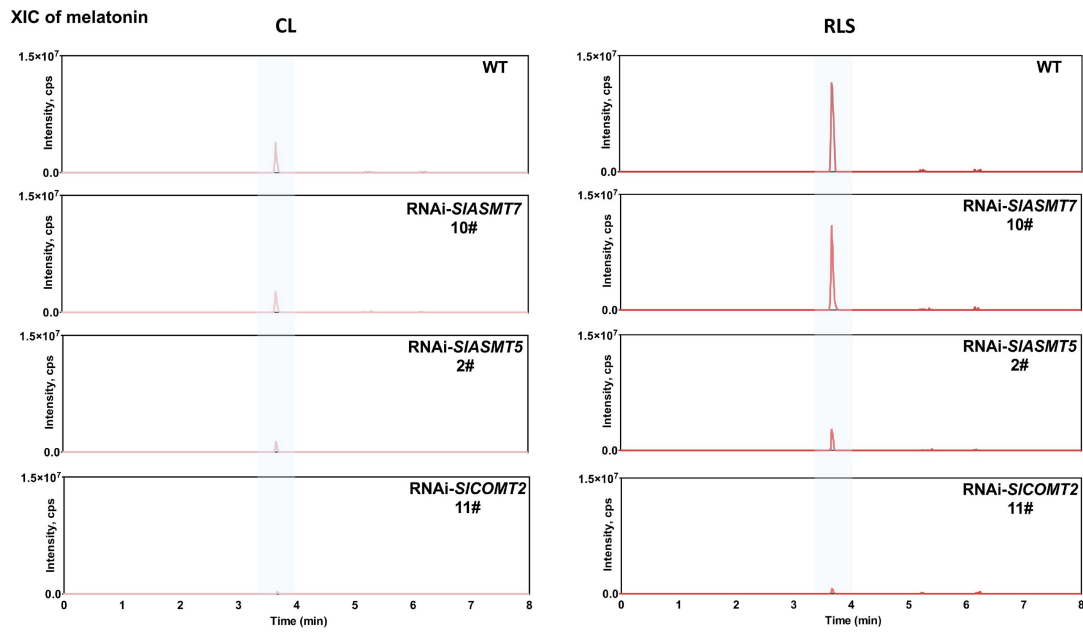

**Fig. S15** The extracted ion chromatogram (XIC) of melatonin detected by LC/MS in wild-type and transgenic tomato fruit under control light <sup>1</sup> and red light supplement (RLS). (associated with Fig. 3c ). Source data are provided as a Source Data file.



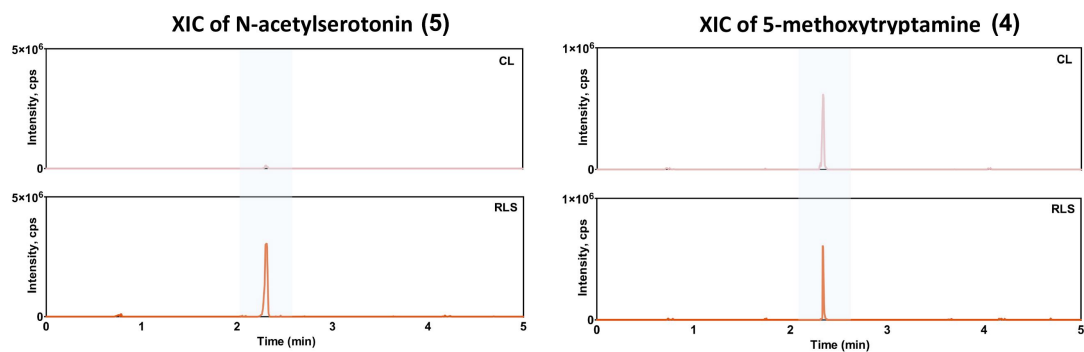

**Fig. S16** The extracted ion chromatogram (XIC) of N-acetylserotonin (5) and 5-methoxytryptamine (4) detected by LC/MS in wild-type tomato fruit under control light <sup>1</sup> and red light supplement (RLS). (associated with Fig. 3b ). Source data are provided as a Source Data file.

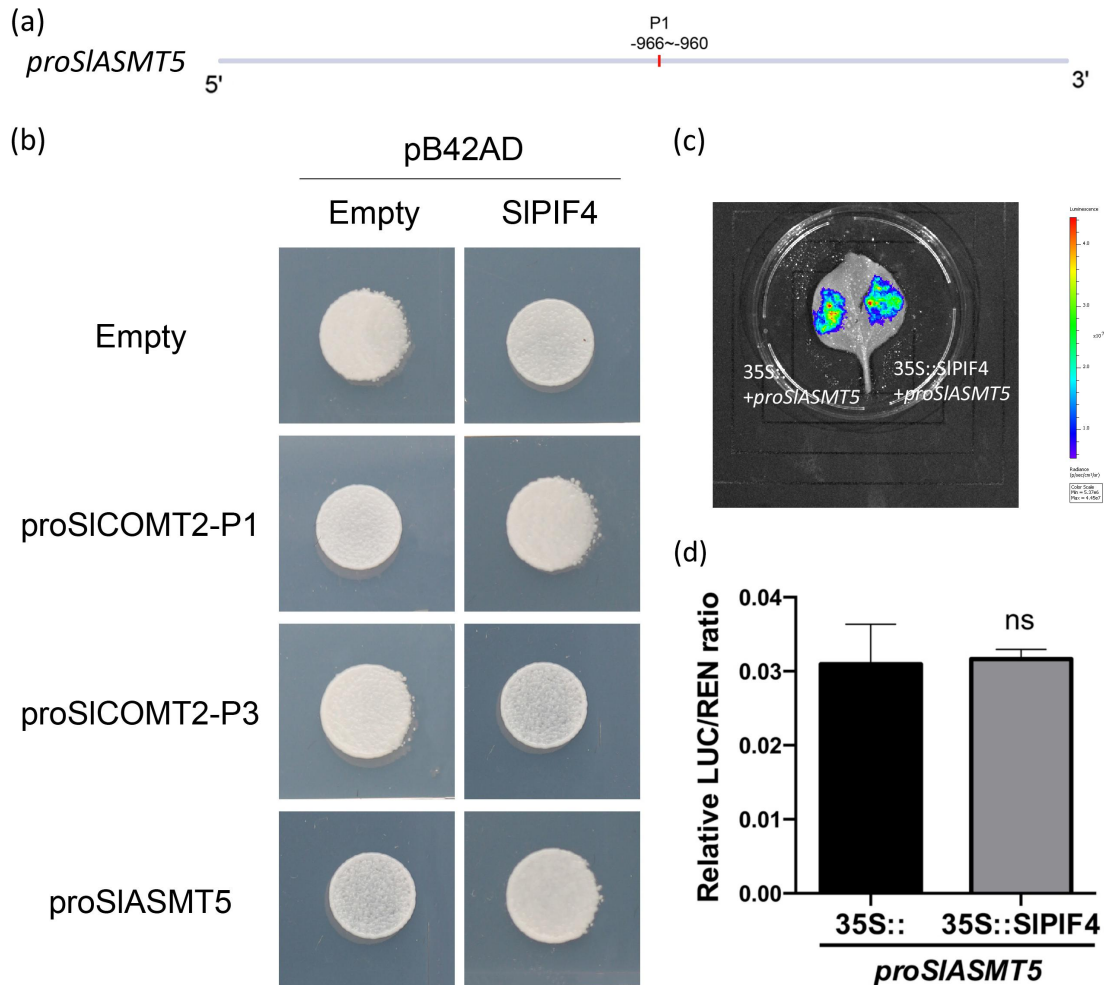

**Fig. S17 Interactions of SIPIF4 proteins and the promoters of *SICOMT2*.** (a) A schematic of the promoter of *SIASMT5*. (b) Interactions of SIPIF4 proteins and the G-BOX fragment of *proSICOMT2* (P1, P3) and the 2000bp sequence of *proSIASMT5* in yeast cells. (c) Interactions of SIPIF4 protein and the *proSIASMT5* confirmed with dual luciferase reporter assays in *Nicotianabenthamiana* leaves. 35S::+*proSIASMT5* were used as controls. (d) Transient expression analysis in protoplasts of tomato. LUC/REN is the average ratio of the bioluminescence of firefly luciferase to that of Renilla luciferase. Data is represented as Mean ± SEM (n=3). No significant difference was observed. (associated with Fig. 4 ).

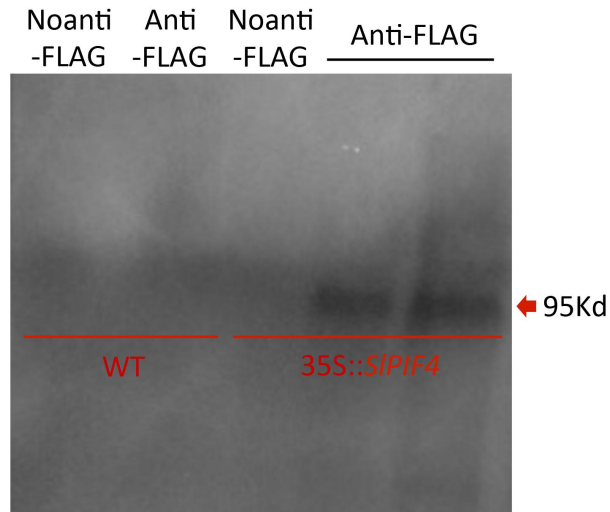

**Fig. S18 Western-Blot analysis of the expression of SIPIF4-3×FLAG recombinant protein.** Detection of the FLAG-tag in the FLAG fusion expression target protein SIPIF4 in the WT and transgenic lines of 35S::*SIPIF4* for CHIP-qPCR assays. Total protein extracts were immunoprecipitated with an anti-FLAG antibody. The target protein band is 95Kd. (associated with Fig. 4i).

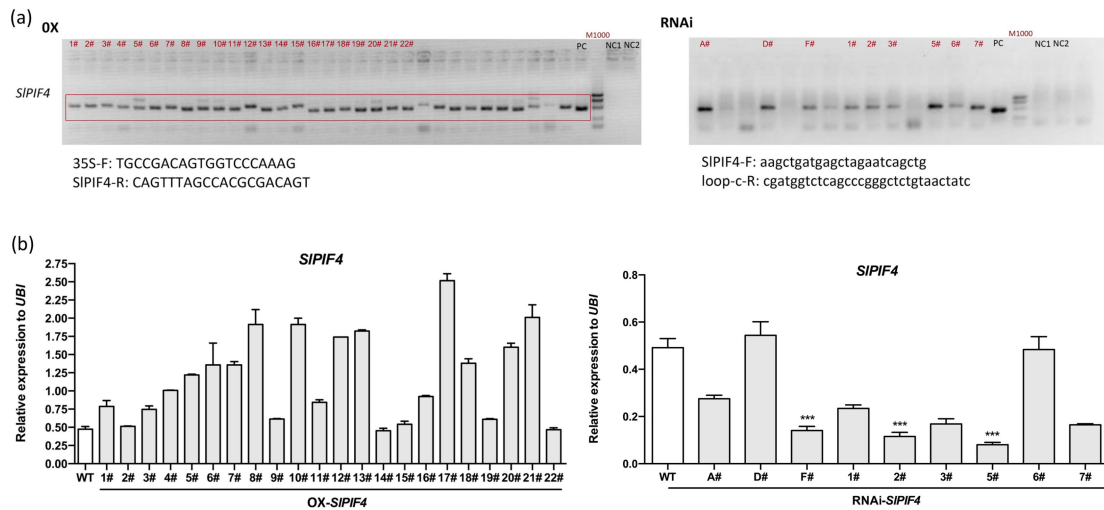

**Fig. S19 Identification of *SIPIF4* overexpression and RNAi plants.**

Genotyping overexpression and RNAi T<sub>0</sub> lines of *SIPIF4*. PC represents the positive control, which was performed by the construction plasmid, and NC1 and NC2 refer to the negative control, NC1 was a template from WT, and NC2 was a template from the ddH<sub>2</sub>O. The respective detection primers are at the bottom of each map. (b) The transcript level of *SIPIF4* in T<sub>0</sub> overexpression and RNAi lines. The expression level of one tomato fruit at Br+3 was calculated as one biological replicate. Data represent the mean  $\pm$  SD (n=3). \*\*\*P < 0.001, (Student's *t* test). (associated with Fig. 3b ). Source data are provided as a Source Data file.

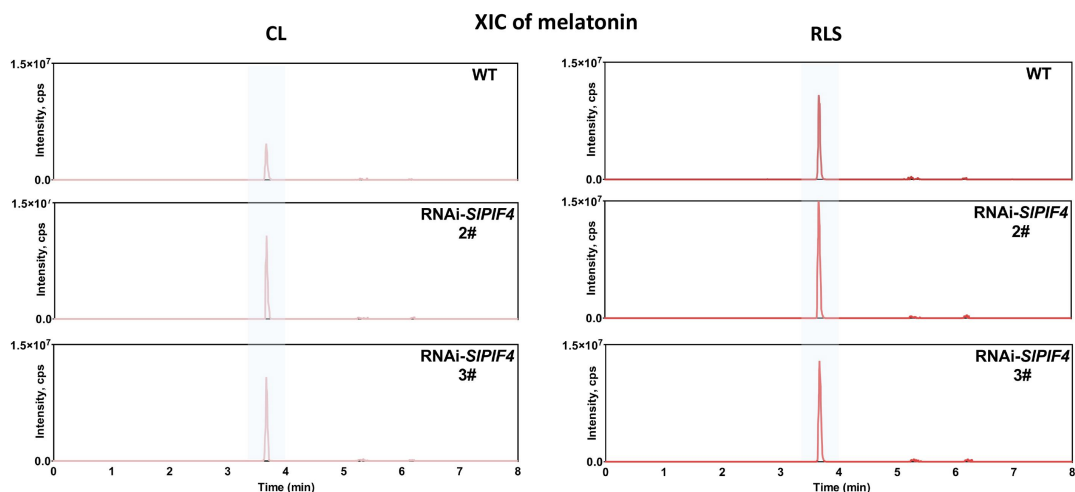

**Fig. S20** The extracted ion chromatogram (XIC) of melatonin detected by LC/MS in wild-type and RNAi-*SIP4* transgenic tomato fruit under control light<sup>1</sup> and red light supplement (RLS). (associated with Fig. 4i ). Source data are provided as a Source Data file.

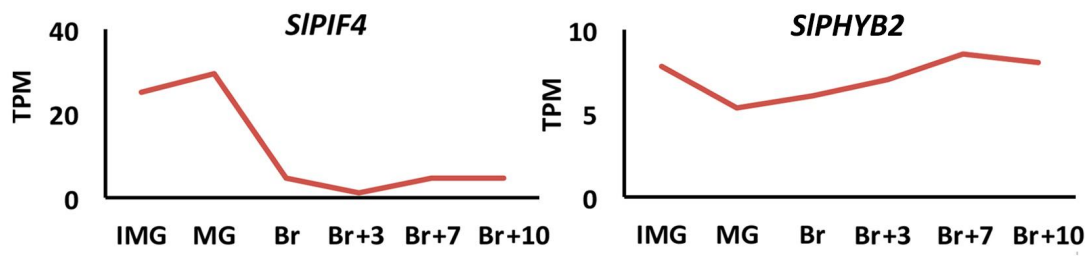

**Fig. S21** The expression trend of *SIPHYB2* and *SIPIF4* in different fruit development stages in the MMN database <sup>34</sup> is the opposite. (associated with Fig. 5).

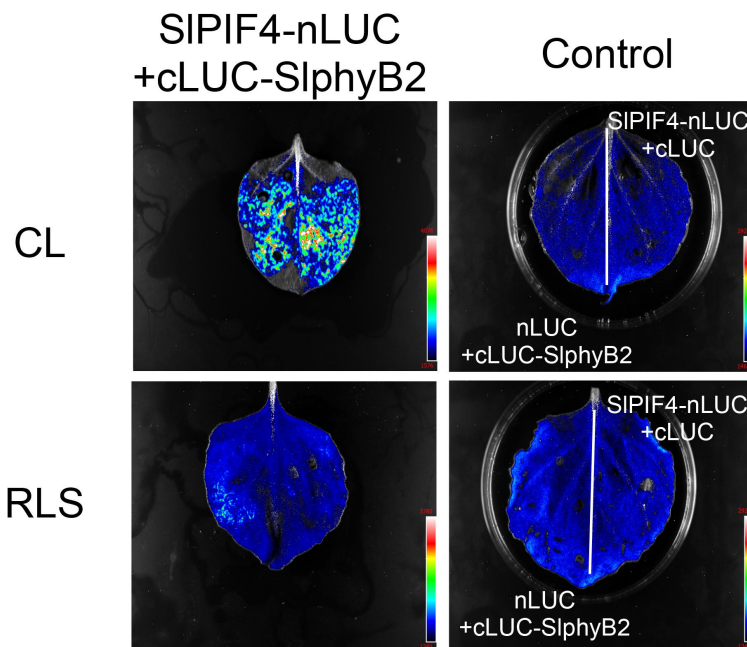

**Fig. S22** Quantitative analysis of luminescence intensity showing the interaction between *SlphyB2* and *SIPIF4* in *Nicotiana benthamiana* leaves. (associated with Fig. 5b).

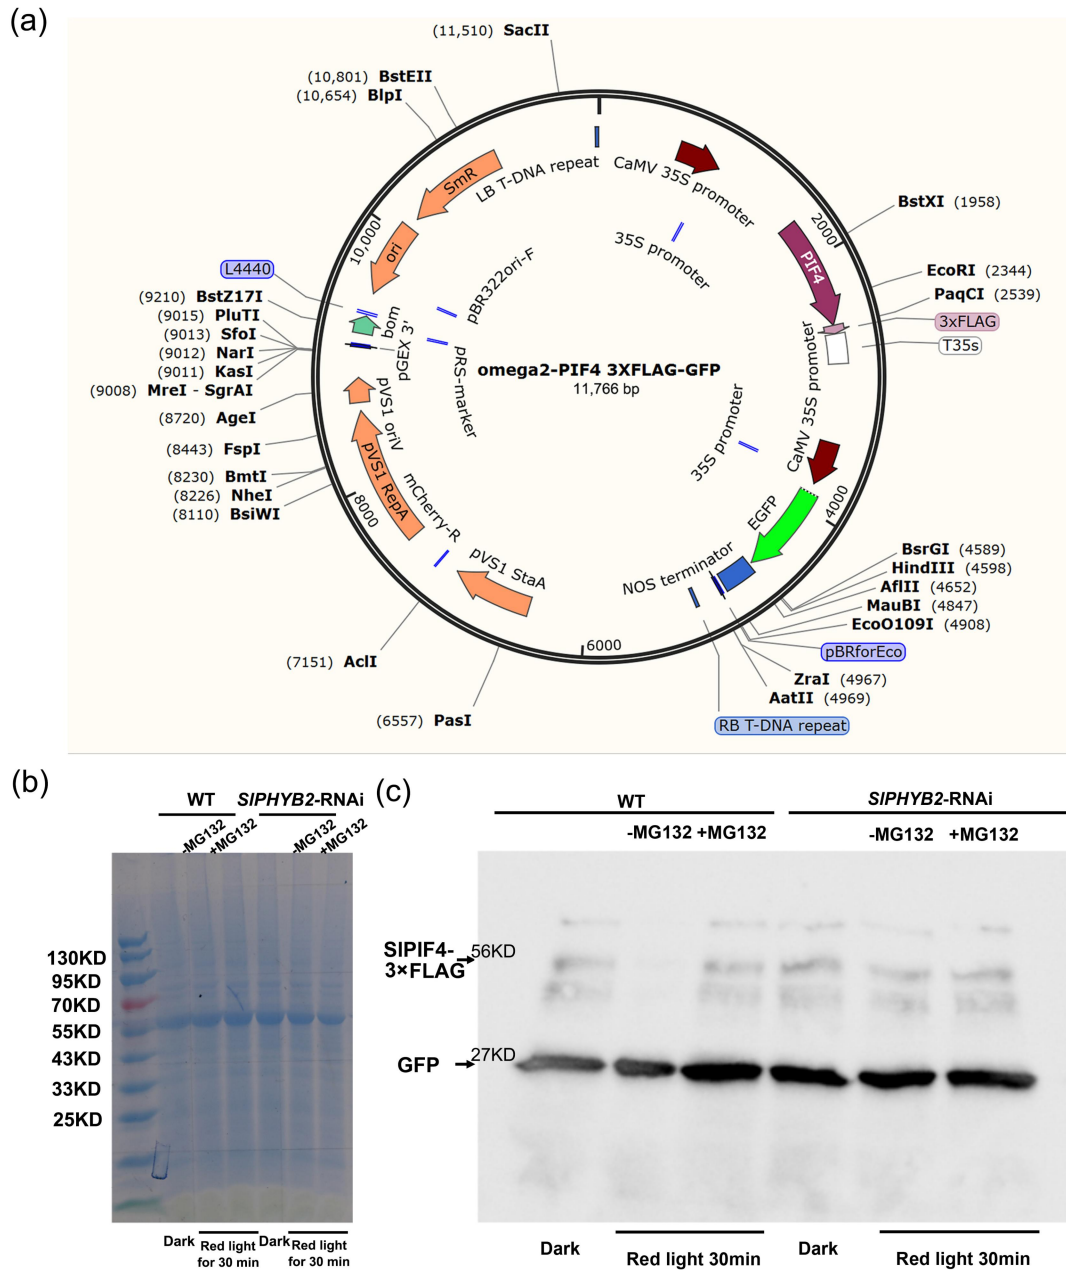

**Fig. S23 Red light response of the degradation of SIPIF4 by SiphyB2.** (a) Constructed plasmid map. (b) SDS-PAGE detects the total protein loading. (c) Western blot detection of ubiquitination degradation of SIPIF4 mediated by SiphyB2. (associated with Fig. 5d). Source data are provided as a Source Data file.

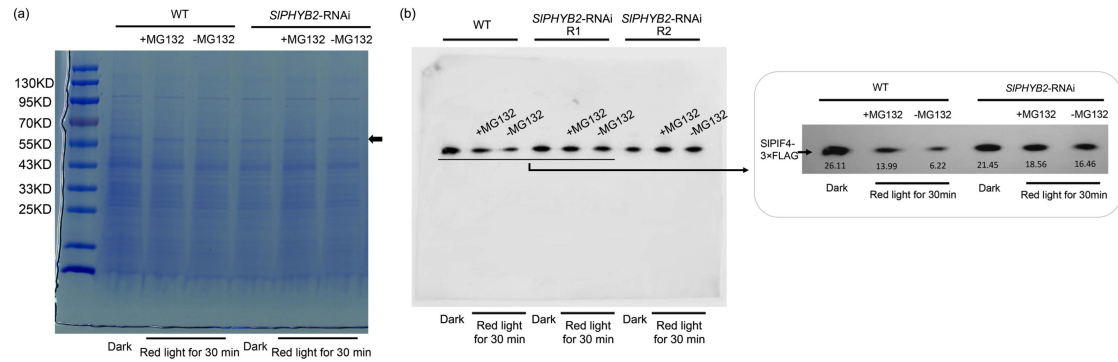

**Fig. S24 The detection by western blot of total protein in WT and transgenic plants of RNAi-SIPHYB2.** (a) SDS-PAGE detects the total protein loading. The black arrow marks the position of the SIPIF4 protein as calculated according to the size of the protein. (b) Full immunoblot image of western-Blot detecting for degradation of SIPIF4 protein. R1 and R2 are two technical replicates. (associated with Fig. 5b). Source data are provided as a Source Data file.



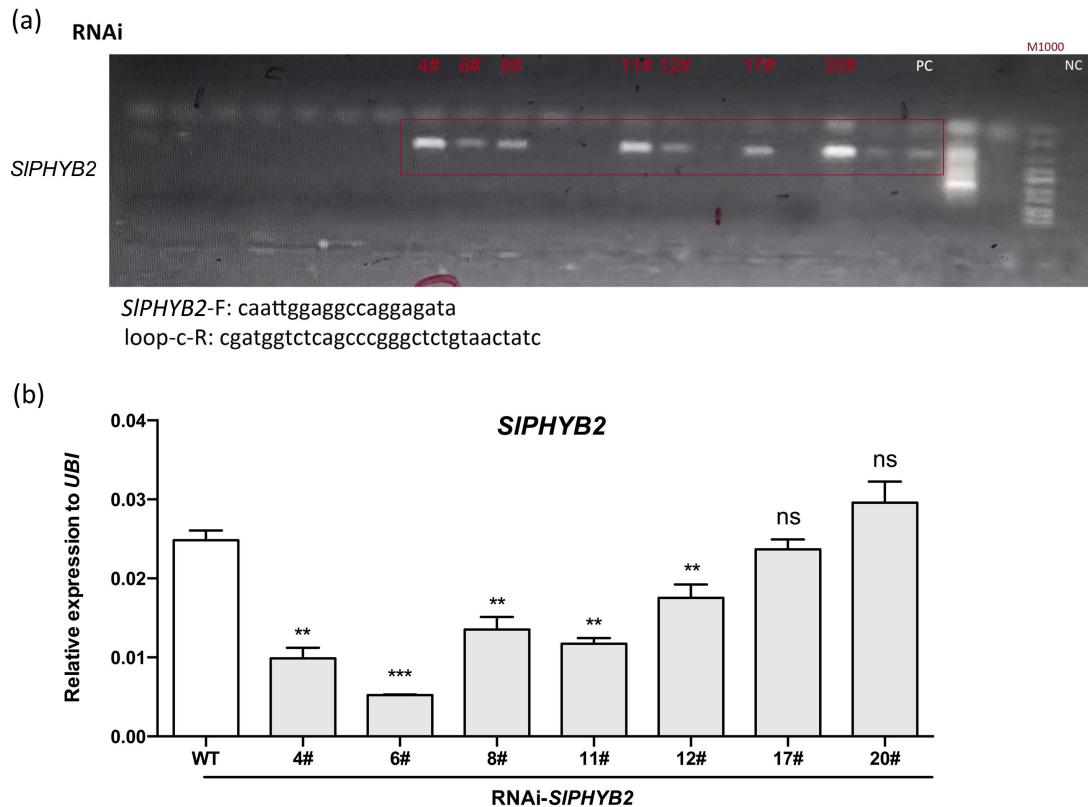

**Fig. S25 Identification of *SIPHYB2* RNAi lines.**

(a) Genotyping T<sub>0</sub> *SIPHYB2* RNAi lines. NC refers to the negative control, NC was a template from WT. The detection primers are at the bottom of the gel. (b) The transcript level of *SIPHYB2* in T<sub>0</sub> RNAi lines. The expression level of one tomato fruit at Br+3 was calculated as one biological replicate. Data represent the mean  $\pm$  SD (n=3). \*\*P < 0.01, (Student's *t* test). ns indicates not significant (P>0.05). (associated with Fig. 5e, f). Source data are provided as a Source Data file.

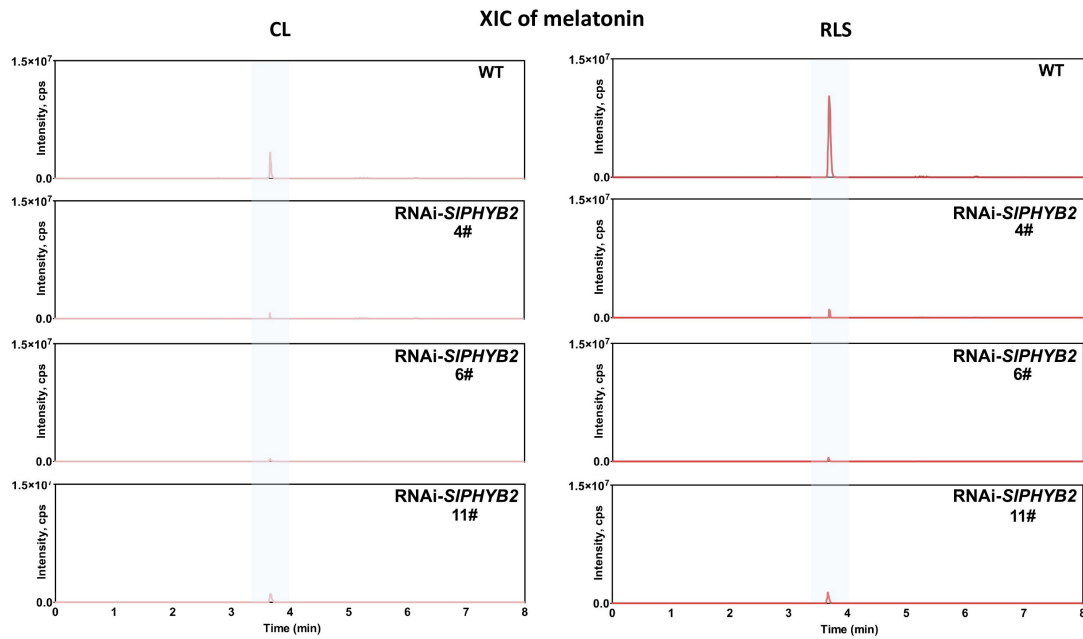

**Fig. S26** The extracted ion chromatogram (XIC) of melatonin detected by LC/MS in wild-type and RNAi-*SIPHYB2* transgenic tomato fruit under control light <sup>1</sup> and red light supplement (RLS). (associated with Fig. 5f). Source data are provided as a Source Data file.

## XIC of melatonin

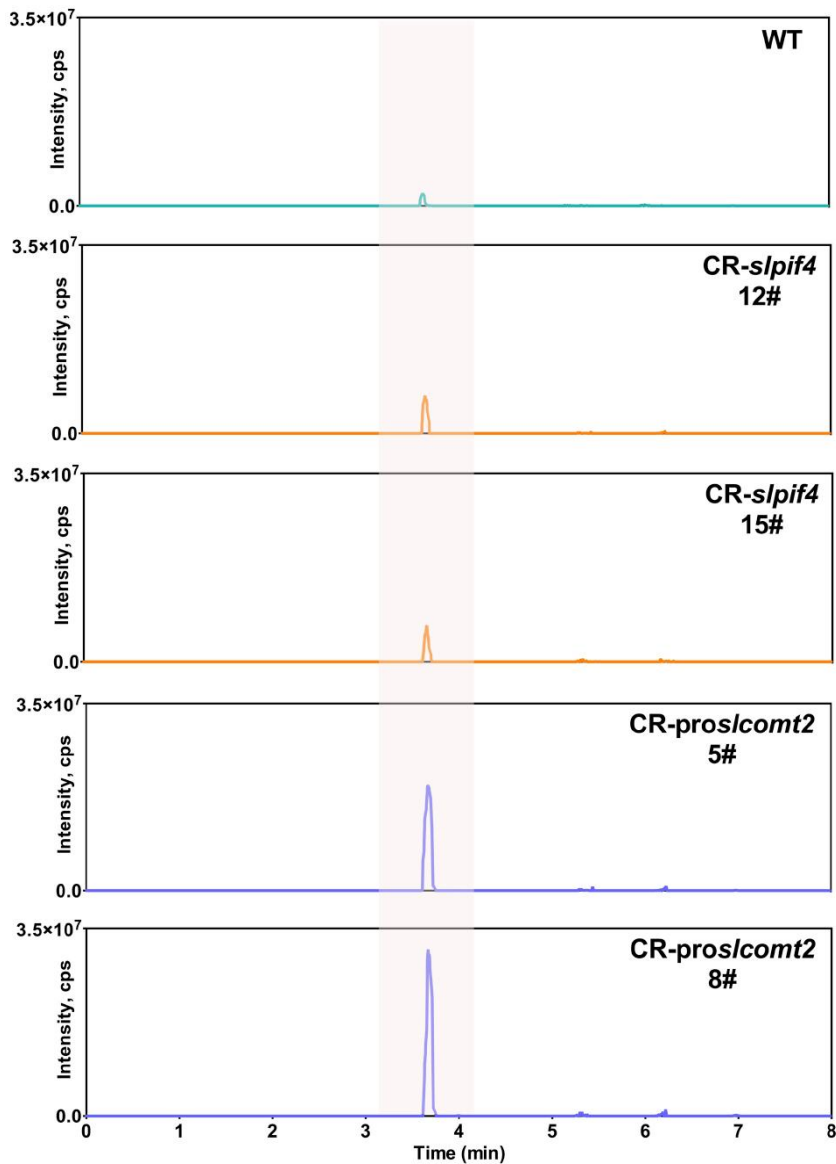

**Fig. S27** The extracted ion chromatogram (XIC) of melatonin detected by LC/MS in wild-type and T2 CRISPR (CR) tomato fruit. (associated with Fig. 7 ). Source data are provided as a Source Data file.

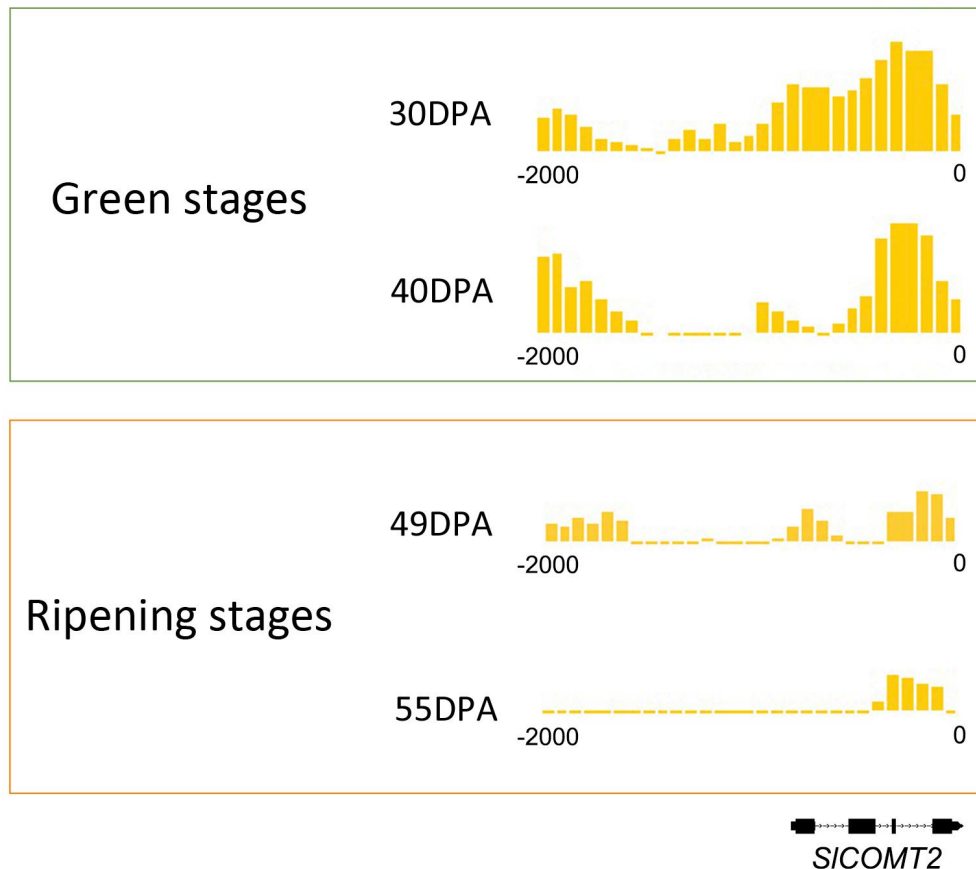

**Fig. S28** The DNA methylation rate of *SICOMT2* at the green stages (30DPA, 40DPA) and ripening stages (49DPA, 55DPA). DPA (days after anthesis).

## Reference

1. Clough, S.J.A.B., A.F. Floral Dip: A Simplified Method for Agrobacterium-Mediated Transformation of *Arabidopsis thaliana*. *Plant J.* **16**, 735-743 (1998).

## Supplementary Tables

**Table S1. The primers used for gene cloning**

| Gene            | Primers' name | Sequence (5'-3')                                 |
|-----------------|---------------|--------------------------------------------------|
| <i>SIT5H</i>    | SIT5H-F       | ATGGAAGCATCAATTCTACAGCT<br>AC                    |
|                 | SIT5H-R       | TTACAACCTTGTTGATGGTTGGA<br>ACAAG                 |
| <i>SITDC280</i> | SITDC280-F    | ATGGGAACCCTTAATTCAAATA<br>ACAAC                  |
|                 | SITDC280-R    | CTAAAACACAATTTTTCTGAGC<br>AAATCAT                |
| <i>SITDC860</i> | SITDC860-F    | ATGGGAAGCCTTGATTCCAA                             |
|                 | SITDC860-R    | TTAAAACACACTTTTTCTCAGC<br>AAACC                  |
| <i>SISNAT</i>   | SISNAT-F      | ATGCAAACCTCTCCACTTAGTATC<br>CAC                  |
|                 | SISNAT-R      | CTAATACATGGGGTACCAGAACA<br>TTCC                  |
| <i>SIAMST7</i>  | SIAMST7-F     | ATGGCCAGTAACAACAATATTT<br>GT                     |
|                 | SIAMST7-R     | TCTCTTTTGAAGCATAAGTAATC<br>CTCA                  |
| <i>SIAMST5</i>  | SIAMST5-F     | ATGGCATTGCCTAATAATATTGG<br>AGAC                  |
|                 | SIAMST5-R     | ATCAAGGGTAAACCTCAATAAC<br>AGACC                  |
| <i>SICOMT2</i>  | SICOMT2-F     | ATGGAGAATGCAAATGGGGAAC<br>CATGACTTGTGAAATTCAAGAA |
|                 | SICOMT2-R     | TC                                               |
| <i>SlphyB2</i>  | SlphyB2-F     | ATGGCTTCTGGGAGTGGA                               |
|                 | SlphyB2-R     | TTGAATCAGCATTGGTAGTTGA                           |

|                   |          |                         |
|-------------------|----------|-------------------------|
|                   |          | AGG                     |
| <i>SIPIF4</i>     | SIPIF4-F | ATGGGATTTGATCATGAGC     |
|                   | SIPIF4-R | AGTGGCAGGTGCATTACTA     |
| <i>Solyc10g00</i> | 8120-F   | ATGGTTGTGCCAATTGTTGG    |
| <i>8120.3</i>     | 8120-R   | TTAAGGATAAACCTCAATTAGT  |
|                   |          | GACCTTAATCC             |
| <i>Solyc02g07</i> | 530-F    | ATGGAAACAAATAATAATGTTG  |
| <i>7530.3</i>     | 530-R    | AGAGAGC                 |
|                   |          | TTAAGGGAAAACCTTGAATGAGG |
|                   |          | GAC                     |
| <i>Solyc06g06</i> | 510-F    | ATGGCCAATAAGAAGAACAACA  |
| <i>4510.2</i>     | 510-R    | T                       |
|                   |          | TTTAAGGATAAACTTCCATTAG  |
|                   |          | AGACCT                  |

---

**Table S2. The primers used for qRT-PCR**

| <b>Gene</b>                        | <b>Primer</b> | <b>Sequence (5'-3')</b>      |
|------------------------------------|---------------|------------------------------|
| <i>SIT5H</i>                       | SIT5H-RT-F    | TCGGCCAAATTCGACTCTA          |
|                                    | SIT5H-RT-R    | GAGCAACCGAAGGAGAGGTA         |
| <i>SITDC280</i>                    | SITDC280-RT-F | TTTCACTCGTGTGCTTTCGG         |
|                                    | SITDC280-RT-R | TATCCTCAGTGAACGTCGCA         |
| <i>SITDC860</i>                    | SITDC860-RT-F | TATGGCTCGTCATGCGTAGT         |
|                                    | SITDC860-RT-R | GGCACGACAACCTTCAAACCT        |
| <i>SISNAT</i>                      | SISNAT-RT-F   | TCAGGGACAAGGACTTGGAA         |
|                                    | SISNAT-RT-R   | TTCCCTCTGGATCAGGTTCA         |
| <i>SIAMST7</i>                     | SIAMST7-RT-F  | GACGTCATTGGTGGACATCG         |
|                                    | SIAMST7-RT-R  | TGCGTTGGCATGAGGAATTT         |
| <i>SIAMST5</i>                     | SIAMST5-RT-F  | CGAAGCTATGGGATGTGACG         |
|                                    | SIAMST5-RT-R  | CCTTCCAAGCCTTCAACCAC         |
| <i>SICOMT2</i>                     | SICOMT2-RT-F  | TGTCTGGAGTTTCTGTGCCA         |
|                                    | SICOMT2-RT-R  | CAACCACCTCAGGCAAATCA         |
| <i>SlphyB2</i>                     | SlphyB2-RT-F  | TGCCGTTGATGTTGAAGGTC         |
|                                    | SlphyB2-RT-R  | GCGCAGTTGTCTGTGATTCT         |
| <i>SIPIF4</i>                      | SIPIF4-RT-F   | TGCAACTGCAGATGATGTGG         |
|                                    | SIPIF4-RT-R   | GTAGTGTTGGACACCAGGA          |
| <i>Solyc10g00</i>                  | 8120-RT-F     | TGCCTCATGTAGTTGAAGGACT       |
| <i>8120.3</i>                      | 8120-RT-R     | TTCTTGCTGGGTATCGCTT          |
| <i>Solyc02g07</i><br><i>7530.3</i> | 530-RT-F      | GGCACTGGCGTTATAGCTAAGAC      |
|                                    | 530-RT-R      | GAGGGACCTTAGTCCAAGGAGA<br>GG |
| <i>Solyc06g06</i><br><i>4510.2</i> | 510-RT-F      | TCTCTGACCTCATTGCTGCTTTG<br>C |
|                                    | 510-RT-R      | CATTGCTACGGTGCCGGTTCC        |

**Table S3. Primers of the vector construction**

| Empty vector       | Primers' name | Sequence (5'-3')                                                             |                                                                                                   |
|--------------------|---------------|------------------------------------------------------------------------------|---------------------------------------------------------------------------------------------------|
| pGreen II 0800-LUC | 0800-proS     | F: CTCGAGGTCGACGGTATCGATAAGCTTTAATTAATCATGATT                                |                                                                                                   |
|                    | lCOMT2        | R: GGGCTGCAGGAATTCGATATCAAGCTTGGCTTCTCTATACTT                                |                                                                                                   |
|                    | 0800-proS     | F: CTCGAGGTCGACGGTATCGATAAGCTTTGATTCCTCTGTCTTGT                              |                                                                                                   |
|                    | lASMT5        | R: GGGCTGCAGGAATTCGATATCAAGCTTTTTTTTCTTTTGAGATG                              |                                                                                                   |
| pCAMBI A1302-GFP   | 02-SIPIF4     | F: GGATCCATGGGATTTGATCATGAGC<br>R: GTCGACAGTGGCAGGTGCATTACTA                 |                                                                                                   |
|                    | 02-SISNA T    | F: GGTACCATGCAAACCTCTCCACTTAGTATCCAC<br>R: GGATCCCTAATACATGGGGTACCAGAACATTCC |                                                                                                   |
|                    | 02-SIAMS T5   | F: GAGCTCATGGCATTGCCTAATAATATTGGAGAC<br>R: GTCGACATCAAGGGTAAACCTCAATAACAGACC |                                                                                                   |
|                    | 02-SIAMS T7   | F: GGTACCATGGCCAGTAACAACAATATTTGT<br>R: GGATCCTCTCTTTTGAAGCATAAGTAATCCTCA    |                                                                                                   |
|                    | 02-SICOM T2   | F: GAGCTCATGGAGAATGCAAATGGGGAAC<br>R: GTCGACCATGACTTGTGAAATTCAGAATC          |                                                                                                   |
|                    | pGEXT4        | GST-SIPIF 4                                                                  | F: ATCGGATCTGGTTCCGCGTGGATCCATGGGATTTGATCATGAGC<br>R: GTCGACCCGGGAATTCGCGGGATCCAGTGGCAGGTGCATTACT |
|                    |               | 42AD-SIPI F4                                                                 | F: CCTTATGATGTGCCAGATTATGCCTCTCCCGAATTCATGGGATT<br>R: CCAAACCTCTGGCGAAGAAGTCCAAAGCTTCTCGAGAGTGGCA |
|                    | pDEST1 7      | His-SISNA T                                                                  | F: GGGGACAAGTTTGTACAAAAAAGCAGGCTTAATGCAAACCTCTC<br>R: GGGGACCACTTTGTACAAGAAAGCTGGGTACTAATACATGGGG |
|                    |               | His-SIASM T7                                                                 | F: GGGGACAAGTTTGTACAAAAAAGCAGGCTTAATGGCCAGTAAC<br>R: GGGGACCACTTTGTACAAGAAAGCTGGGTATCAAATATTCTTT  |
|                    |               | His-SIASM T5                                                                 | F: GGGGACAAGTTTGTACAAAAAAGCAGGCTTAATGGCATTGCCT<br>R: GGGGACCACTTTGTACAAGAAAGCTGGGTATCAAGGGTAAACC  |
|                    |               | His-SICOM T2                                                                 | F: GGGGACAAGTTTGTACAAAAAAGCAGGCTTAATGGAGAATGCA<br>R: GGGGACCACTTTGTACAAGAAAGCTGGGTATCATGACTTGTGA  |
|                    |               | pCAMBI                                                                       | 06-SIPIF4                                                                                         |



A1306

R: GTCGACAGTGGCAGGTGCATTA

06-SISNA F: GGTACCATGCAA

T R: GGATCCCTAATA

06-SIAMS F: GAGCTCATGGCATTGCCTAATAATATTGGAGAC

T5 R: GTCGACATCAAGGGTAAACCTCAATAACAGACC

06-SIAMS F: GGTACCATGGCCAGTAACAACAATATTTGT

T7 R: GGATCCTCTCTTTTGAAGCATAAGTAATCCTCA

06-SICOM F: GAGCTCATGGAGAATGCAAATGGGGAAC

T2 R: GTCGACCATGACTTGTGAAATTCAGAATC

RNAi(1)-S F: CGATGGTCTCACA

IPIF4 R: CGATGGTCTCACAGGAAGCTGGCTCACCATTTGCC

RNAi(2)-l F: CGATGGTCTCACCTGCAGGTCTAGTTTTTCT

oop-SIPIF R: CGATGGTCTCAGCCCGGGCTCTGTA

4

RNAi(3)-S F: CGATGGTCTCAGGGCAAGCTGGCTCACCATTTGCC

IPIF4 R: CGATGGTCTCATA

RNAi(1)-S F: CAGTGGTCTCACAACATGCTGCATTTGAACAATCT

lphyB2 R: CGATGGTCTCACAGGGCATTTC

RNAi(2)-l F: CGATGGTCTCACCTGCAGGTCTAGTTTTTCT

oop-Slphy R: CGATGGTCTCAGCCCGGGCTCTGTA

B2

RNAi(3)-S F: CAGTGGTCTCAGGGCGCATTTC

lphyB2 R: CAGTGGTCTCATA

RNAi(1)-S F: CAGTGGTCTCACAACGCTGCCGTTGTCAACCTTCA

ISNAT R: CGATGGTCTCACAGGCTTGGAGATC

RNAi(2)-l F: CGATGGTCTCACCTGCAGGTCTAGTTTTTCT

pBWA(V oop-SISNA

)HS T R: CGATGGTCTCAGCCCGGGCTCTGTA

RNAi(3)-S F: CAGTGGTCTCAGGGCCTTGGAGATC

ISNAT R: CAGTGGTCTCATA

RNAi(1)-S F: CAGTGGTCTCACA

IASMT7 R: CGATGGTCTCACAGGAATCAGAAATCAACAAATTA

RNAi(2)-l F: CGATGGTCTCACCTGCAGGTCTAGTTTTTCT

|                  |                                                                                  |
|------------------|----------------------------------------------------------------------------------|
| oop-SIAS<br>MT7  | R: CGATGGTCTCAGCCCGGGCTCTGTAACTATC                                               |
| RNAi(3)-S        | F: CAGTGGTCTCAGGGCAATCAGAAATCAACAAATTA                                           |
| IASMT7           | R: CAGTGGTCTCATACATATCACCAACAACAAGGAGA                                           |
| RNAi(1)-S        | F: CAGTGGTCTCACAACATGTTTTTGTACAATTTTCC                                           |
| IASMT5           | R: CGATGGTCTCACAGGTTGAGCAGCAAGGACTTCAT                                           |
| RNAi(2)-I        | F: CGATGGTCTCACCTGCAGGTCTAGTTTTTCT                                               |
| oop-SIAS<br>MT5  | R: CGATGGTCTCAGCCCGGGCTCTGTAACTATC                                               |
| RNAi(3)-S        | F: CAGTGGTCTCAGGGCTTGAGCAGCAAGGACTTCAT                                           |
| IASMT5           | R: CAGTGGTCTCATAAATGTTTTTGTACAATTTTCC                                            |
| RNAi(1)-S        | F: CGATGGTCTCACAACGTGTTCAAGGAACATGTTGATGACG                                      |
| ICOMT2           | R: CGATGGTCTCACAACGTGTTCAAGGAACATGTTGATGACG                                      |
| RNAi(2)-I        | F: CGATGGTCTCACCTGCAGGTCTAGTTTTTCT                                               |
| oop-SICO<br>MT2  | R: CGATGGTCTCAGCCCGGGCTCTGTAACTAT                                                |
| RNAi(3)-S        | F: CGATGGTCTCAGGGCAAGCTGGCTCACCATTTGCC                                           |
| ICOMT2           | R: CGATGGTCTCATACATGTGTTCAAGGAACATGTTGATGACG                                     |
| ZMPL-D           | Cas9-SISN F: CAGTGGTCTCATGCAATCTGTTCAACTGTTCCATC                                 |
| M-Cas9           | AT R: CAGTGGTCTCAAACTGCAACATCAGATCATGCAT                                         |
| Cas9-SIAS<br>MT7 | F: CAGTGGTCTCATGCACAACGGGATGTTGGGCGAAA<br>R: CAGTGGTCTCAAAACGTGCCGTGGCGATGGCTATC |
| Cas9-SIAS<br>MT5 | F: CAGTGGTCTCATGCAACGAACGGGGCTAGACTCAA<br>R: CAGTGGTCTCAAAACCGTTCGCGAACCATTACCG  |
| Cas9-proS        | F: CAGTGGTCTCATGCATTACGTATGCTCACGAGCTA                                           |
| ICOMT2           | R: CAGTGGTCTCAAAACGATGGTGCTGGAGCACGTAC                                           |
| pEAQ-812<br>0    | F: GTCGACATGGTTGTGCCAATTGTTGG<br>R: GAGCTCTTAAGGATAAACCTCAATTAGTGACCTTAATCC      |
| pEAQ-530         | F: GTCGACATGGAAACAAATAATAATGTTGAGAGAGC<br>R: GAGCTCTTAAGGGAAAACCTTGAATGAGGGAC    |

|        |          |                                                                           |
|--------|----------|---------------------------------------------------------------------------|
|        | pEAQ-510 | F: GTATACATGGCCAATAAGAAGAACAACAT<br>R: GAGCTCTTTAAGGATAAACTTCCATTAGAGACCT |
| pEAQ-H | pEAQ-SIT | F: GTCGACATGGAAGCATCAATTCTACAGCTAC                                        |
| T-DES  | 5H-F     | R: GAGCTCTTACAACCTTGTTGATGGTTGGAACAAG                                     |
| T3     | pEAQ-SIT | F: GTCGACATGGGAACCCTTAATTCAAATAACAAC                                      |
|        | DC280    | R: GAGCTCCTAAAACACAATTTTTCTGAGCAAATCAT                                    |
|        | pEAQ-SIT | F: GTCGACATGGGAAGCCTTGATTCCAA                                             |
|        | DC860    | R: GAGCTCTTAAAACACACTTTTTCTCAGCAAACC                                      |
|        | pEAQ-SIS | F: GTCGACATGCAAACCTCTCCACTTAGTATCCAC                                      |
|        | NAT      | R: GAGCTCCTAATACATGGGGTACCAGAACATTCC                                      |
|        | pEAQ-SIA | F: GTCGACATGGCCAGTAACAACAATATTTGT                                         |
|        | SMT7     | R: GAGCTCTCTCTTTTGAAGCATAAGTAATCCTCA                                      |
|        | pEAQ-SIA | F: GTCGACATGGCATTGCCTAATAATATTGGAGAC                                      |
|        | SMT5     | R: GAGCTCATCAAGGGTAAACCTCAATAACAGACC                                      |
|        | pEAQ-SIC | F: GTCGACATGGAGAATGCAAATGGGGAAC                                           |
|        | OMT2     | R: GAGCTCCATGACTTGTGAAATTCAAGAATC                                         |

---

**Table S4. Partial display of sequencing results of yeast screen library**

| ID               | Note                                                                                                  |
|------------------|-------------------------------------------------------------------------------------------------------|
| Solyc06g074820.3 | tonoplast intrinsic protein 1.1                                                                       |
| Solyc06g036290.3 | heat shock protein 90                                                                                 |
| Solyc05g052980.3 | Protein phosphatase 2C (AHRD V3.3 *** Q8RVG0_TOBAC)                                                   |
| Solyc08g067030.3 | transmembrane "protein," putative (Protein of unknown "function," DUF642) (AHRD V3.3 *** AT5G11420.1) |
| Solyc09g092380.3 | S-adenosyl-l-homocysteine hydrolase                                                                   |
| Solyc07g053830.3 | ADP,ATP carrier "protein," mitochondrial (AHRD V3.3 *** ADT1_SOLTU)                                   |
| Solyc02g085950.3 | cell wall protein X77373                                                                              |
| Solyc08g006890.3 | Tubulin alpha chain (AHRD V3.3 *** TBA_PRUDU)                                                         |
| Solyc06g081980.1 | Pyridoxal biosynthesis protein PDX1-like protein (AHRD V3.3 *** T2DNB9_PHAVU)                         |
| Solyc07g043580.4 | bHLH transcription factor 052 (PIF4)                                                                  |
| Solyc01g006430.3 | Fatty acid desaturase (AHRD V3.3 *** M4QSE6_9ERIC)                                                    |
| Solyc04g049330.3 | V-type proton ATPase subunit G (AHRD V3.3 *** A0A0B2RXB3_GLYSO)                                       |
| Solyc06g059740.3 | 2 Alcohol dehydrogenase (AHRD V3.3 *** ADH_MALDO)                                                     |
| Solyc09g065590.3 | auxin canalization protein (DUF828) (AHRD V3.3 *** AT3G22810.1)                                       |
| Solyc09g010800.4 | metallothionein II-like protein                                                                       |
| Solyc06g071920.3 | Glyceraldehyde-3-phosphate dehydrogenase (AHRD V3.3 *** C9DRQ8_SOLCH)                                 |
| Solyc10g047410.1 | Photosystem II CP43 reaction center protein (AHRD V3.3 *-* PSBC_SOLLC)                                |
| Solyc06g006080.3 | thiamine biosynthesis protein ThiC                                                                    |

Solyc03g118780.3 Pathogenesis-related thaumatin family protein (AHRD V3.3 \*\*\* G7LDC8\_MEDTR)

Solyc09g007850.3 RNA binding protein (AHRD V3.3 \*\*\* Q39209\_ARATH)

Solyc10g048060.1 myosin XI D (AHRD V3.3 --\* AT2G33240.5)

Solyc11g010230.2 Histone H3 (AHRD V3.3 \*\*\* K7VSQ3\_MAIZE)

Solyc10g085880.1 Glycosyltransferase (AHRD V3.3 \*\*\* K4DF51\_SOLLC)

Solyc09g097770.3 Glycine-rich protein (AHRD V3.3 \*\*\* D2K2T8\_TOBAC)

Solyc08g067030.3 transmembrane "protein," putative (Protein of unknown "function," DUF642) (AHRD V3.3 \*\*\* AT5G11420.1)

Solyc09g092380.3 S-adenosyl-l-homocysteine hydrolase

Solyc07g043360.1 60S ribosomal protein L27 (AHRD V3.3 \*\*\* K4CEJ5\_SOLLC)

Solyc01g087600.3 transmembrane "protein," putative (DUF288) (AHRD V3.3 \*\*\* AT2G41770.1)

Solyc02g082130.2 LOW QUALITY:Surfeit locus protein 6 (AHRD V3.3 \*\*\* AT5G05210.2)

Solyc12g035130.2 RNA helicase DEAD36

Solyc06g065230.3 N-acetyltransferase (AHRD V3.3 \*\*\* K7WTW4\_SOLTU)

Solyc09g092380.3 S-adenosyl-l-homocysteine hydrolase

---
