# Supplementary material for: Understanding the mechanism of red light-induced melatonin biosynthesis facilitates the engineering of melatonin-enriched tomatoes
Source: PubMed Central journal article supplement (PMC10491657; doi:10.1038/s41467-023-41307-5), 2023-09-08
Supplement: 41467_2023_41307_MOESM3_ESM.pdf [file 41467_2023_41307_MOESM3_ESM.pdf]

**Description of Additional Supplementary Files**

**Supplementary Data 1** Transcription Factors from Yeast Library Screening
